# Supplementary material for: Legionella pneumophila as Cause of Severe Community-Acquired Pneumonia, China
Source: PubMed Central journal article supplement (PMC6924908; doi:10.3201/eid2601.190655), 2020-01
Supplement: 19-0655-Techapp-s1.pdf [file 19-0655-Techapp-s1.pdf]

# *Legionella pneumophila* as a Cause of Severe Community-Acquired Pneumonia, China

## Appendix

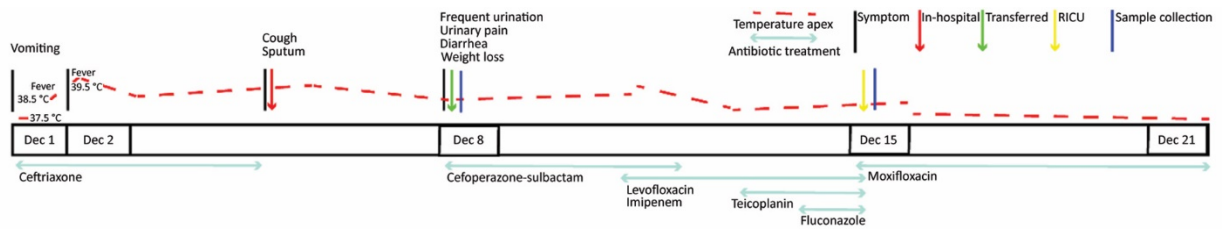

**Appendix Figure.** Illness and treatment over time of a patient with community-acquired pneumonia caused by *Legionella pneumophila* bacteria, China.
